# Supplementary material for: A network pharmacology approach to uncover the key ingredients in Ginkgo Folium and their anti-Alzheimer’s disease mechanisms
Source: PubMed Central journal article supplement (PMC8351672; doi:10.18632/aging.203348), 2021-07-27
Supplement: aging-13-203348-s001.pdf [file aging-13-203348-s001.pdf]

## SUPPLEMENTARY TABLE

**Supplementary Table 1. Main herbs containing genkwanin.**

| <b>Herb id</b> | <b>Herb Pinyin name</b> | <b>Herb English name</b>                                       |
|----------------|-------------------------|----------------------------------------------------------------|
| HERB006632     | YIN XING YE             | <i>Ginkgo Folium</i>                                           |
| HERB000253     | BAI MU XIANG            | <i>Chinese Eaglewood</i>                                       |
| HERB000508     | BO HE                   | <i>Mentha, Peppermint</i>                                      |
| HERB000910     | CI CAO SU               | <i>Pungent Jerusalem sage</i>                                  |
| HERB001032     | DA FENG ZI              | <i>Hydnocarp Anthelminticae Semen</i>                          |
| HERB001407     | DU YI WEI               | <i>Common Lamio-phlomis</i>                                    |
| HERB002000     | GUANG GUO GAN CAO       | <i>Licorice</i>                                                |
| HERB002002     | GUANG HUO XIANG         | <i>Pogostemon Cablin (Blanco) Benth.</i>                       |
| HERB002658     | JI CHA KAI LA RUI A     | <i>Spreading Creosote-bush</i>                                 |
| HERB002870     | JIAO ZHI SHU WEI CAO    | <i>Sticky Clary</i>                                            |
| HERB002991     | JING QIAO MAI           | <i>Rhizome fagopyri dibotryis</i>                              |
| HERB003282     | LE GE WANG GEN          | <i>Wikstroemiae Indicae Rasix</i>                              |
| HERB003658     | MA HUANG                | <i>Ephedra</i>                                                 |
| HERB003917     | MI DIE XIANG            | <i>Rosemary</i>                                                |
| HERB004546     | QING YE DAN             | <i>All - grass of Mile Swertia</i>                             |
| HERB004757     | SAN CHI LA RUI A        | <i>Creosote-bush</i>                                           |
| HERB004950     | SHAN ZHU YU             | <i>Asiatic Cornelian Cherry Fruit</i>                          |
| HERB004973     | SHE GAN                 | <i>Blackberrylily Rhizome</i>                                  |
| HERB005039     | SHI DI                  | <i>Calyx and receptacle of a Persimmon</i>                     |
| HERB005132     | SHU QU CAO              | <i>Gphalii Affinis Herba</i>                                   |
| HERB005412     | TAO REN                 | <i>Peach Seed</i>                                              |
| HERB005915     | XI YE YI MU CAO         | <i>Siberian Motherwort</i>                                     |
| HERB006537     | YI MU CAO               | <i>Motherwort</i>                                              |
| HERB006586     | YIN CHEN                | <i>Virgate Wormwood Herb</i>                                   |
| HERB006587     | YIN CHEN HAO            | <i>Capillary Wormwood Equivalent plant: Artemisia scoparia</i> |
| HERB006655     | YING TAO                | <i>Falsesour Cherry</i>                                        |
| HERB006718     | YU JIN                  | <i>Tuber - root of Common Turmeric</i>                         |
| HERB006773     | YUAN HUA                | <i>Flower bud of Lilac Daphne</i>                              |
| HERB006881     | ZAO XIN TU              | <i>Earth inside of Hearth</i>                                  |
